# Supplementary material for: Access to functionalized quinones via the aromatic oxidation of phenols bearing an alcohol or olefinic function catalyzed by supported iron phthalocyanine
Source: Royal Society of Chemistry journal article supplement (doi:10.1039/b608834a), 2006-01-01
Supplement: b608834a.pdf [file b608834a.pdf]

**Access to functionalized quinines via aromatic oxidation of phenols bearing  
an alcohol or olefin function catalyzed by supported iron phthalocyanine.**

Olga V. Zalomaeva and Alexander B. Sorokin\*

*Institut de Recherches sur la Catalyse, CNRS,*

*2 avenue Albert Einstein, 69626 Villeurbanne Cedex, France ; [sorokin@catalyse.cnrs.fr](mailto:sorokin@catalyse.cnrs.fr)*

***Electronic Supporting Information***

Figure S1. Oxidation of 2-hydroxybenzyl alcohol. Determination of the conversion and 2-hydroxymethyl-1,4-benzoquinone yield using the signals of benzylic protons and signals of biphenyl as an internal standard.

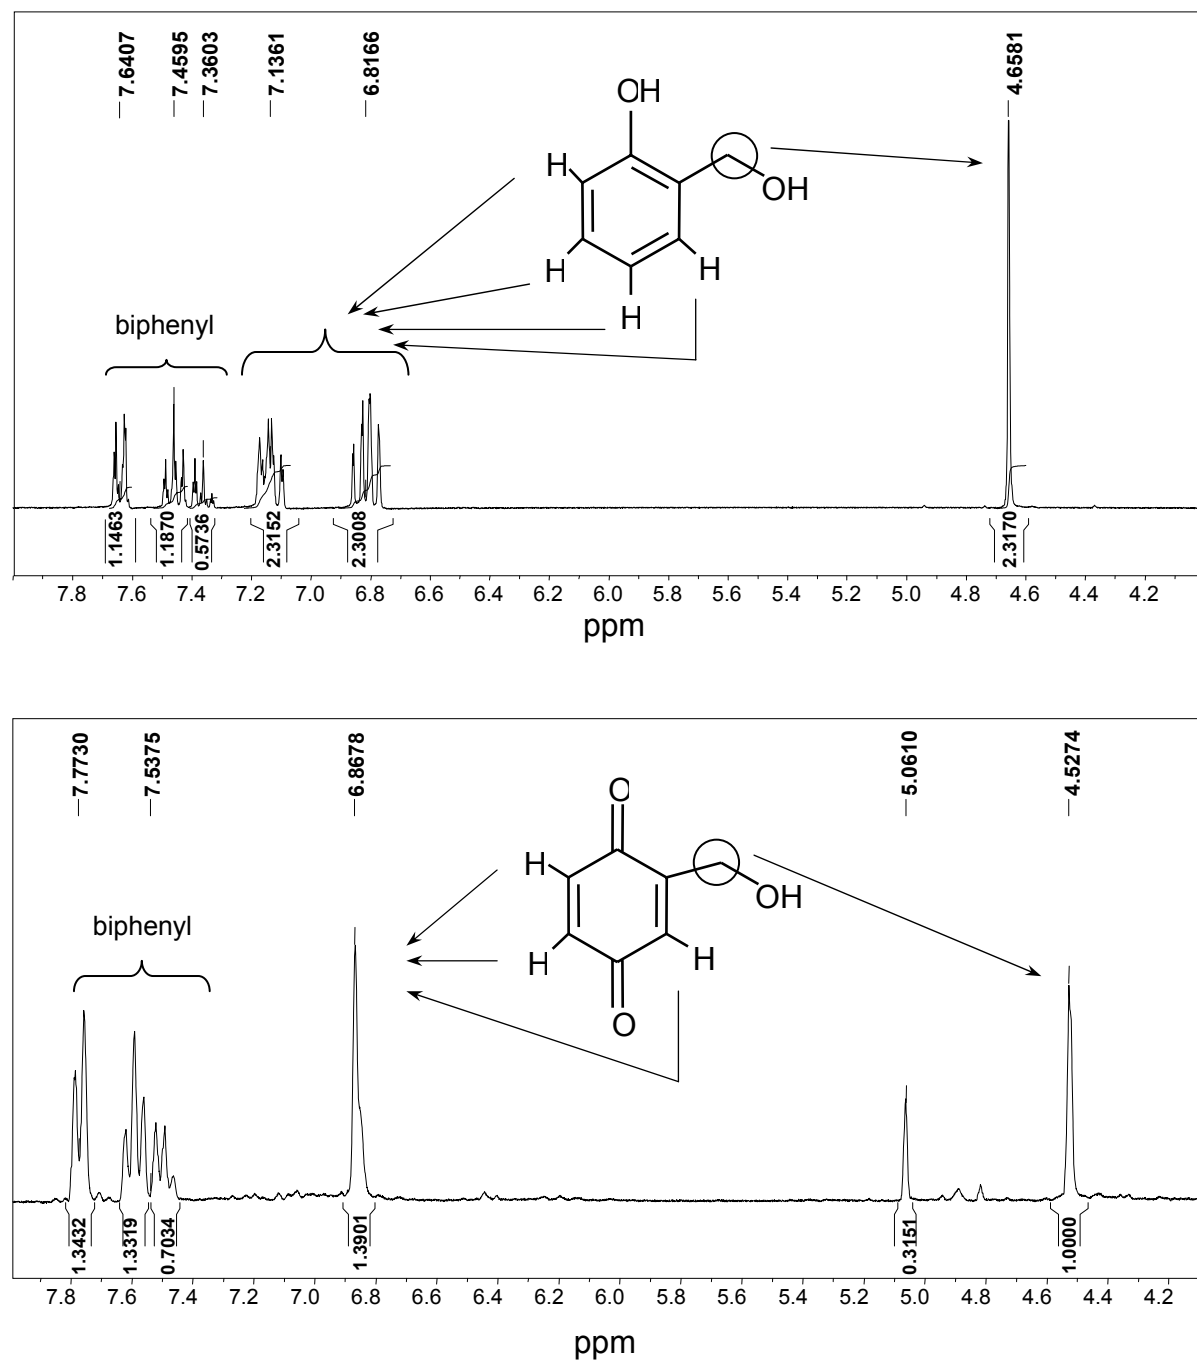

### **2-hydroxybenzyl alcohol**

MS (EI) m/z (relative int.): 124 (45, [M]<sup>+</sup>), 106 (64, [M-H<sub>2</sub>O]<sup>+</sup>), 78 (100, [M-H<sub>2</sub>O-CO]<sup>+</sup>).

<sup>1</sup>H NMR (CD<sub>3</sub>COCD<sub>3</sub>, 250 MHz): δ 4.70 (s, 2H, CH<sub>2</sub>), 6.74-6.80 (m, 2H, CH aromatic), 7.05-7.25 (m, 2H, CH aromatic).

### **2-hydroxymethyl-1,4-benzoquinone**

MS (EI) m/z (relative int.): 138 (20, [M]<sup>+</sup>), 122 (16, [M-O]<sup>+</sup>), 110 (100, [M-CO]<sup>+</sup>), 94 (10, [M-2O]<sup>+</sup>), 82 (28, [M-2CO]<sup>+</sup>).

<sup>1</sup>H NMR (CD<sub>3</sub>COCD<sub>3</sub>, 250 MHz): δ 4.44 (s, 2H, CH<sub>2</sub>), 6.74-6.78 (m, 3H, CH aromatic).

### **3-hydroxybenzyl alcohol**

MS (EI) m/z (relative int.): 124 (100, [M]<sup>+</sup>), 123 (29, [M-H]<sup>+</sup>), 107 (18, [M-OH]<sup>+</sup>), 106 (16, [M-H<sub>2</sub>O]<sup>+</sup>), 105 (23, [M-H<sub>2</sub>O-H]<sup>+</sup>), 95 (60, [M-COH]<sup>+</sup>), 77 (60, [M-H<sub>2</sub>O-COH]<sup>+</sup>).

<sup>1</sup>H NMR (CD<sub>3</sub>COCD<sub>3</sub>, 250 MHz): δ 4.13 (t, 1H, OH, J=5.7 Hz), 4.54 (d, 2H, CH<sub>2</sub>, J=5.7 Hz), 6.55 (d, 1H, CH aromatic, J=3.38 Hz), 6.77-6.85 (m, 2H, CH aromatic), 7.11 (t, 1H, CH aromatic, J=7.8 Hz).

### **3,5-dihydroxybenzyl alcohol**

MS (EI) m/z (relative int.): 140 (100, [M]<sup>+</sup>), 139 (12, [M-H]<sup>+</sup>), 123 (14, [M-OH]<sup>+</sup>), 122 (15, [M-H<sub>2</sub>O]<sup>+</sup>), 121 (18, [M-H<sub>2</sub>O-H]<sup>+</sup>), 111 (54, [M-COH]<sup>+</sup>), 93 (22, [M-H<sub>2</sub>O-COH]<sup>+</sup>).

<sup>1</sup>H NMR (CD<sub>3</sub>COCD<sub>3</sub>, 250 MHz): δ 4.38 (s, 2H, CH<sub>2</sub>), 6.14 (t, 1H, CH aromatic, J=2.3 Hz), 6.25-6.28 (m, 2H, CH aromatic).

**2-hydroxy-6-hydroxymethyl-1,4-benzoquinone**

MS (EI): unstable under analysis conditions

$^1\text{H}$  NMR ( $\text{CD}_3\text{COCD}_3$ , 250 MHz):  $\delta$  4.34 (s, 2H,  $\text{CH}_2$ ), 5.8 (d, 1H, CH aromatic,  $J=2.5$  Hz), 6.51 (d, 1H, CH aromatic,  $J=2.5$  Hz).

**3-hydroxyphenethyl alcohol**

MS (EI) m/z (relative int.): 138 (61,  $[\text{M}]^+$ ), 120 (6,  $[\text{M}-\text{CO}]^+$ ), 108 (70,  $[\text{M}-\text{CH}_2\text{O}]^+$ ), 107 (100,  $[\text{M}-\text{CH}_2\text{OH}]^+$ ), 90 (12,  $[\text{M}-\text{CH}_2\text{O}-\text{H}_2\text{O}]^+$ ), 77 (35,  $[\text{M}-\text{CHCH}_2\text{O}-\text{H}_2\text{O}]^+$ ).

$^1\text{H}$  NMR ( $\text{CD}_3\text{COCD}_3$ , 250 MHz):  $\delta$  2.71 (t, 2H,  $\underline{\text{CH}}_2\text{CH}_2\text{OH}$ ,  $J=7.0$  Hz), 3.70 (t, 2H,  $\underline{\text{CH}}_2\text{CH}_2\text{OH}$ ,  $J=7.0$  Hz), 6.63-6.70 (m, 3H, CH aromatic), 7.07 (t, 1H, CH aromatic,  $J=7.7$  Hz).

**2-(2-hydroxyethyl)-1,4-benzoquinone**

MS (EI): unstable under analysis conditions

$^1\text{H}$  NMR ( $\text{CD}_3\text{COCD}_3$ , 250 MHz):  $\delta$  2.54 (t, 2H,  $\underline{\text{CH}}_2\text{OH}$ ,  $J=6.3$  Hz), 3.65 (t, 2H,  $\underline{\text{CH}}_2\text{CH}_2\text{OH}$ ,  $J=6.3$  Hz), 6.57-6.72 (m, 3H, CH aromatic).

**2-allylphenol**

MS (EI) m/z (relative int.): 134 (100,  $[\text{M}]^+$ ), 133 (38,  $[\text{M}-\text{H}]^+$ ), 119 (33,  $[\text{M}-\text{CH}_3]^+$ ), 115 (34,  $[\text{M}-\text{H}_2\text{O}-\text{H}]^+$ ), 107 (19,  $[\text{M}-\text{CH}_2\text{CH}]^+$ ), 105 (21,  $[\text{M}-\text{COH}]^+$ ), 91 (41,  $[\text{M}-\text{CH}_2-\text{COH}]^+$ ), 77 (30,  $[\text{M}-\text{CH}_2\text{CH}_2-\text{COH}]^+$ ).

$^1\text{H}$  NMR ( $\text{CD}_3\text{CN}$ , 250 MHz):  $\delta$  3.34 (d, 2H,  $\underline{\text{CH}}_2\text{CH}=\text{CH}_2$ ,  $J=6.5$  Hz), 5.00-5.08 (m, 2H,  $\text{CH}_2\text{CH}=\underline{\text{CH}}_2$ ), 5.92-6.08 (m, 1H,  $\text{CH}_2\underline{\text{CH}}=\text{CH}_2$ ), 6.78-6.81 (m, 2H, CH aromatic), 6.84 (s, 1H, OH), 7.03-7.10 (m, 2H, CH aromatic).

**2-allyl-1,4-benzoquinone**

MS (EI) m/z (relative int.): 148 (33, [M]<sup>+</sup>), 147 (42, [M-H]<sup>+</sup>), 131 (6, [M-OH]<sup>+</sup>), 120 (54, [M-CO]<sup>+</sup>), 105 (13, [M-CH<sub>2</sub>-COH]<sup>+</sup>), 92 (13, [M-2CO]<sup>+</sup>), 91 (100, [M-2CO-H]<sup>+</sup>).

<sup>1</sup>H NMR (CD<sub>3</sub>CN, 250 MHz): δ 3.15 (dd, 2H, CH<sub>2</sub>CH=CH<sub>2</sub>, J<sub>1</sub>=6.8 Hz, J<sub>2</sub>=1.4), 4.98-5.12 (m, 2H, CH<sub>2</sub>CH=CH<sub>2</sub>), 5.80-6.10 (m, 1H, CH<sub>2</sub>-CH=C), 6.54-6.77 (m, 3H aromatic).
